# Supplementary material for: Synthesis of Quasi-MOFs featuring special hub-and-spoke channels and surface NiO species for enhanced total hydrogenation of furfural
Source: Royal Society of Chemistry journal article supplement (doi:10.1039/d3ma00938f), 2023-12-04
Supplement: d3ma00938f1.pdf [file d3ma00938f1.pdf]

## Supporting Information

### **Synthesis of Quasi-MOF featured with special hub-and-spoke channels and surface NiO species for enhanced total hydrogenation of furfural**

Qiuju Fu<sup>a,b</sup>, Liting Yan<sup>a</sup>, Lingzhi Yang<sup>c\*</sup>, Dandan Liu<sup>b</sup>, Shuo Zhang<sup>b</sup>, Huimin Jiang<sup>b</sup>, Wenpeng Xie<sup>b</sup>,  
Haiyan Wang<sup>d\*</sup> and Xuebo Zhao<sup>a,b\*</sup>

<sup>a</sup> *School of Materials Science and Engineering, Qilu University of Technology (Shandong Academy of Sciences), Jinan 250353 (P.R. China)*

<sup>b</sup> *College of Chemistry and Chemical Engineering, China University of Petroleum (East China), Qingdao 266580, (P.R. China)*

<sup>c</sup> *School of Science and Engineering, The Chinese University of Hong Kong, Shenzhen 518172 (P.R. China)*

<sup>d</sup> *School of Petrochemical Engineering, Liaoning Petrochemical University, Liaoning 113001, (P.R. China)*

E-mail addresses: zhaoxuebo@upc.edu.cn (X. Zhao).

|                                                                                                                                                                       |    |
|-----------------------------------------------------------------------------------------------------------------------------------------------------------------------|----|
| Experimental.....                                                                                                                                                     | 3  |
| Materials.....                                                                                                                                                        | 3  |
| Fig. S1 TG of Ni-MOF-74 with ramp rate of 10 °C·min <sup>-1</sup> in N <sub>2</sub> atmosphere.....                                                                   | 4  |
| Fig. S2 Pore size distribution at 77 K of Ni-MOF-74 and Ni-MOF-74 (T) samples.....                                                                                    | 4  |
| Fig. S3 SEM image of Ni-MOF-74 precursor.....                                                                                                                         | 5  |
| Fig. S4 TEM image of Ni-MOF-74 precursor.....                                                                                                                         | 5  |
| Fig. S5 TEM of Ni-MOF-74 (250) sample.....                                                                                                                            | 6  |
| Fig. S6 TEM of Ni-MOF-74 (300) sample.....                                                                                                                            | 6  |
| Fig. S7 The decomposition process of Ni-MOF-74 monitored by mass spectrometry from room temperature to 300 °C at a rate of 5 °C·min <sup>-1</sup> .....               | 7  |
| Fig. S8 Pore size distributions at 77 K of Ni-MOF-74 and the derivants.....                                                                                           | 7  |
| Fig. S9 Percentage of micropore and mesopore of Ni-MOF-74 derivatives.....                                                                                            | 8  |
| Fig. S10 Changes of micropore and mesopore of Ni-MOF-74 derivatives.....                                                                                              | 8  |
| Fig. S11 SEM of Ni/NiO/C-12h sample.....                                                                                                                              | 9  |
| Fig. S12 HRTEM of Quasi-MOF-9h sample.....                                                                                                                            | 10 |
| Fig. S13 HRTEM of Ni/NiO/C-12h sample.....                                                                                                                            | 10 |
| Fig. S14 XPS spectra of survey scan.....                                                                                                                              | 11 |
| Fig. S15 C 1s spectra of Quasi-MOFs and Ni/NiO/C-12h samples.....                                                                                                     | 11 |
| Fig. S16 Ni 2p spectra of Ni-MOF-74 (250) sample.....                                                                                                                 | 12 |
| Fig. S17 Ni 2p spectra of a) commercial NiO powder and b) NiO powder prepared by treating Ni(OAc) <sub>2</sub> ·4H <sub>2</sub> O at 300 °C under air conditions..... | 12 |
| Fig. S18 Ni 2p spectra of Ni-commercial and Ni/NiO/C-12h samples.....                                                                                                 | 13 |
| Fig. S19 Ni 2p spectra of Quasi-MOF-3h and Ni-MOF-74 (350) samples.....                                                                                               | 13 |
| Fig. S20 The condensation reaction route of FFR and ethanol.....                                                                                                      | 14 |
| Fig. S21 TEM image of Ni-MOF-74 (350) and corresponding particle size distribution.....                                                                               | 14 |
| Fig. S22 XRD pattern of Quasi-MOF-9h after five consecutive runs.....                                                                                                 | 15 |
| Fig. S23 N <sub>2</sub> adsorption-desorption isotherm at 77 K of Quasi-MOF-9h after five consecutive runs.....                                                       | 15 |

|                                                                                                           |    |
|-----------------------------------------------------------------------------------------------------------|----|
| Fig. S24 TEM pattern of Quasi-MOF-9h after five consecutive runs. ....                                    | 16 |
| Fig. S25 Correlation between percentage of Ni <sup>2+</sup> , <sub>surf</sub> and THFA yields.....        | 16 |
| Fig. S26 Correlation between total pore volume and THFA yields. ....                                      | 17 |
| Fig. S27 Correlation between H <sub>2</sub> uptake and THFA yields.....                                   | 17 |
| Fig. S28 H <sub>2</sub> -TPD curves of the derivants of Quasi-MOF-3h and Ni-MOF-74(350) samples.<br>..... | 18 |
| Table S1. Textural properties of Ni-MOF-74 and Ni-MOF-74 (T) samples .....                                | 19 |
| Table S2. Textural properties of Ni-MOF-74 derivants treated at 300 °C .....                              | 19 |
| Table S3. Elements analysis of the as-prepared samples (XPS results) .....                                | 20 |
| Table S4. Ratio of integral areas of the Ni 2p XPS high-resolution spectrum .....                         | 20 |
| Table S5. Elements analysis of the as-prepared samples (ICP-OES results) .....                            | 20 |
| Table S6. Catalytic performance of heterogeneous catalysts for the conversion of FFR to<br>THFA .....     | 21 |
| Reference: .....                                                                                          | 23 |

## **Experimental**

### **Materials.**

2, 5-dihydroxyterephthalic acid (denoted as dhtp, 98%) was purchased from Aladdin Chemicals. Nickel acetate tetrahydrate ( $\text{Ni}(\text{OAc})_2 \cdot 4\text{H}_2\text{O}$ , 98%), ethanol (99.7%) and furfural (FFR, 99%) were purchased from Sinopharma Chemical Reagent Co. Ltd (SCRC). Furfuryl alcohol (FFA, 99%) and tetrahydrofurfuryl alcohol (THFA, 99%) were obtained from Damas-beta Chemicals. Deionized water (DIW) was used in all experiments. All the reagents were used without further purification.

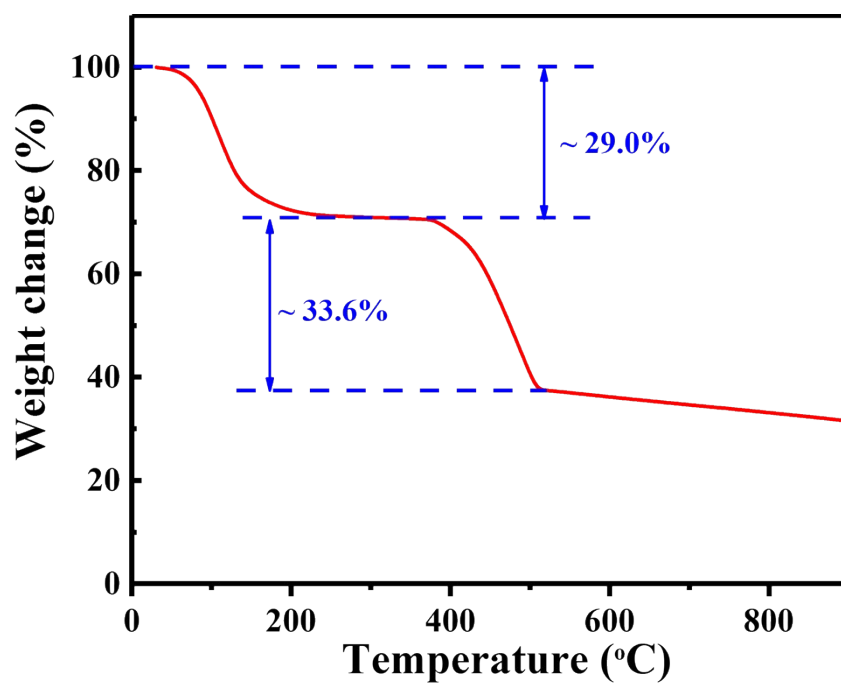

Fig. S1 TG of Ni-MOF-74 with ramp rate of  $10\text{ }^{\circ}\text{C}\cdot\text{min}^{-1}$  in  $\text{N}_2$  atmosphere.

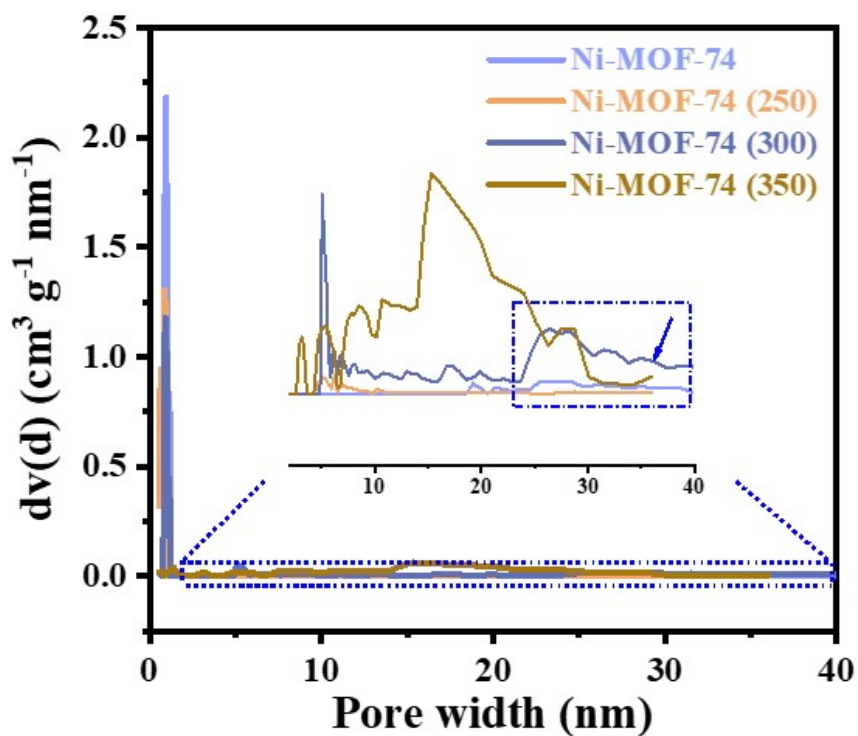

Fig. S2 Pore size distribution at 77 K of Ni-MOF-74 and Ni-MOF-74 (T) samples.

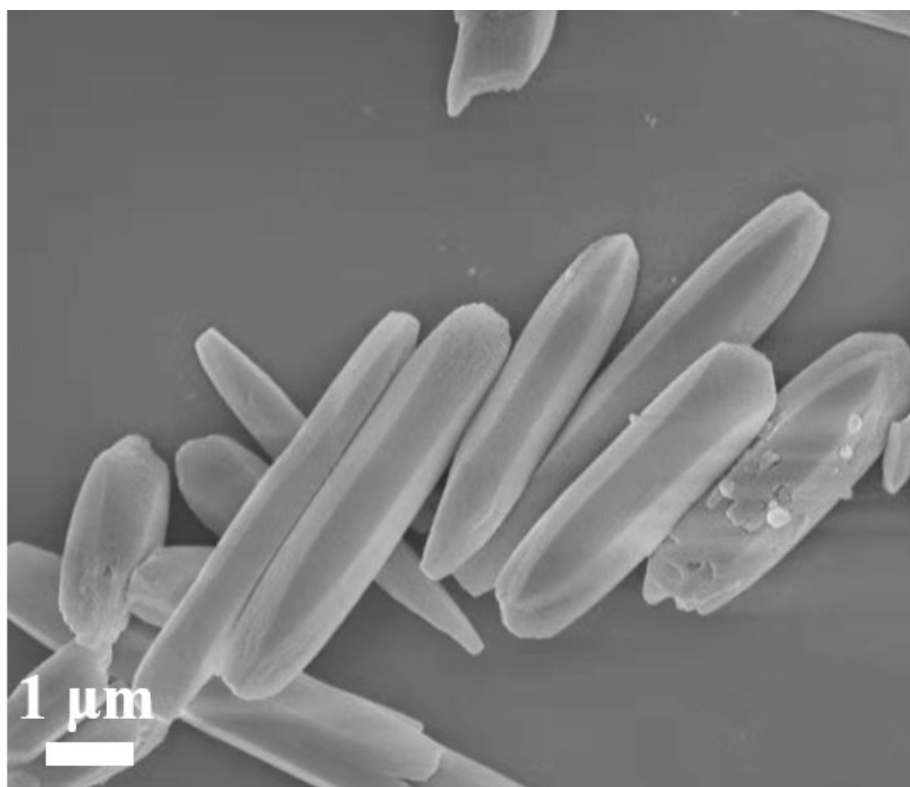

**Fig. S3 SEM image of Ni-MOF-74 precursor.**

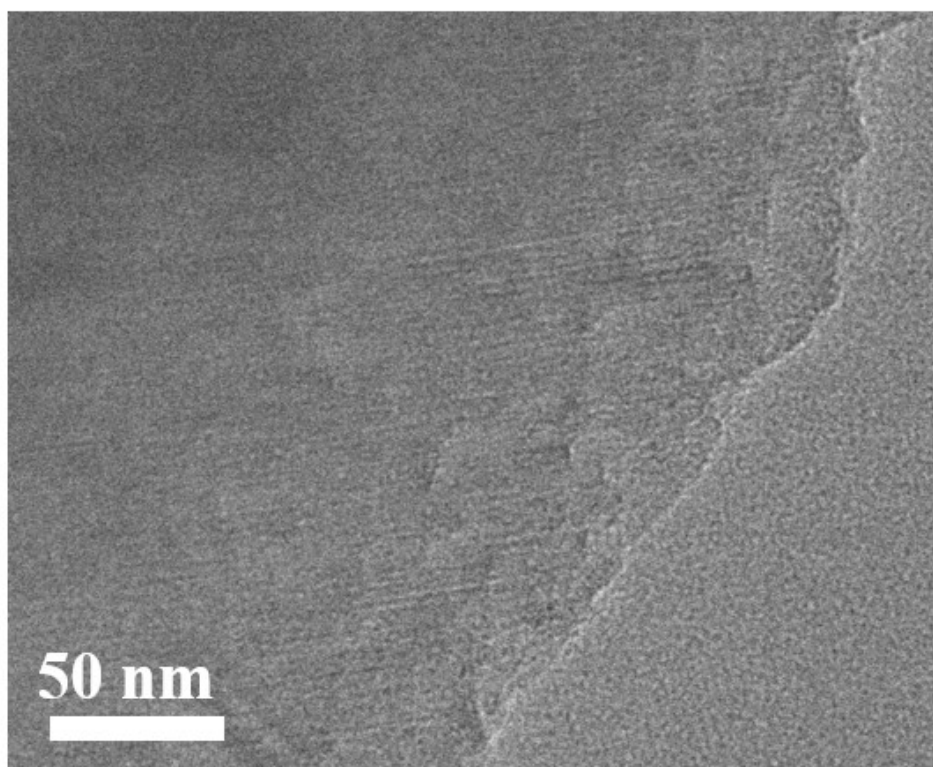

**Fig. S4 TEM image of Ni-MOF-74 precursor.**

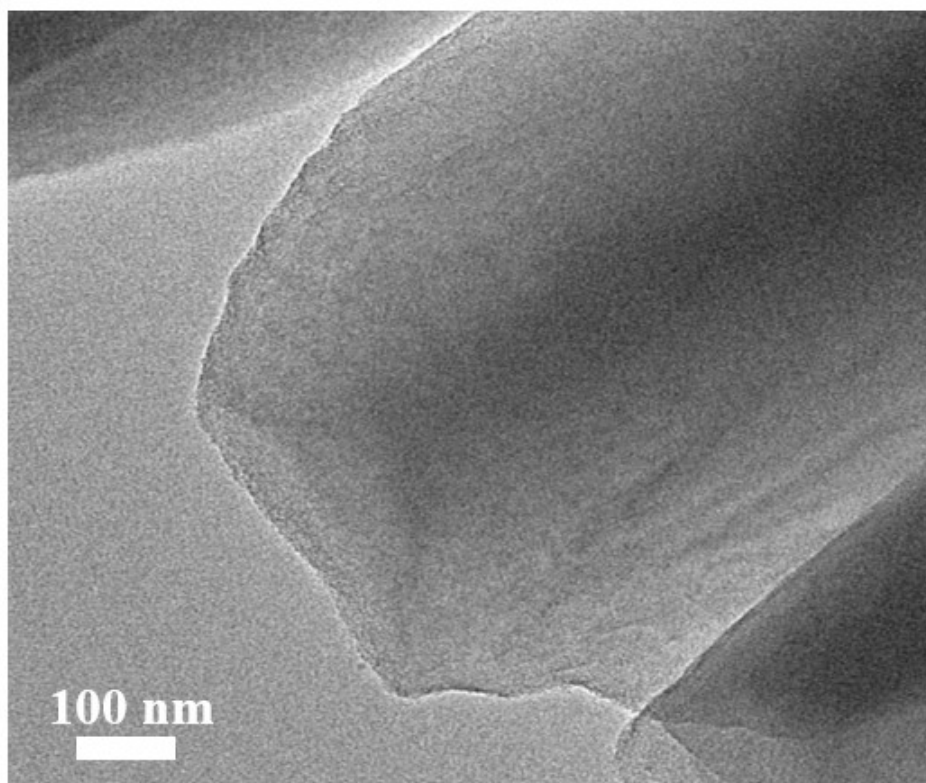

**Fig. S5 TEM of Ni-MOF-74 (250) sample.**

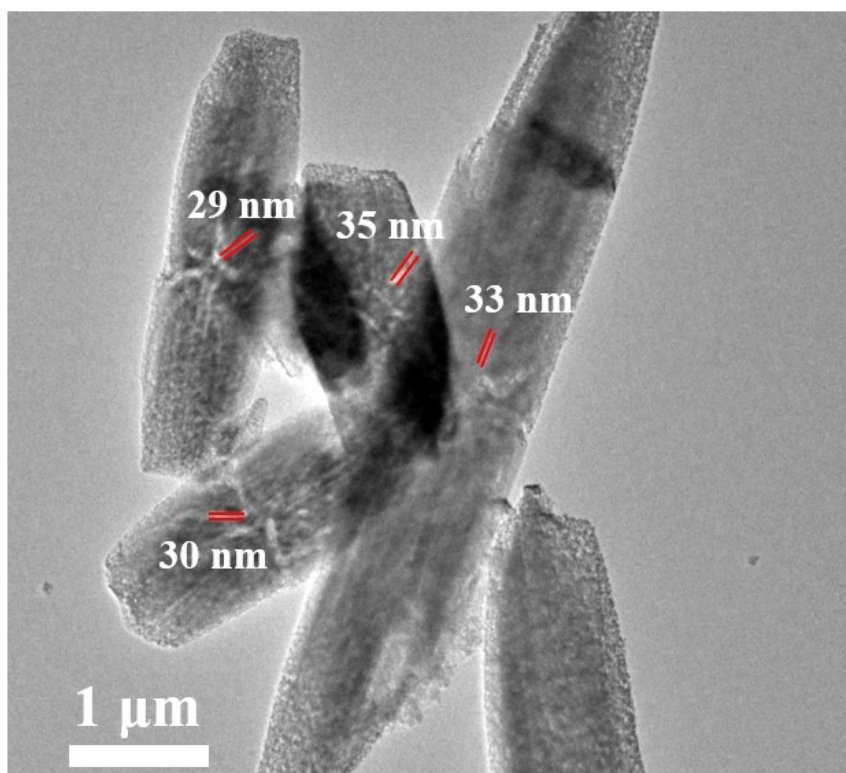

**Fig. S6 TEM of Ni-MOF-74 (300) sample.**

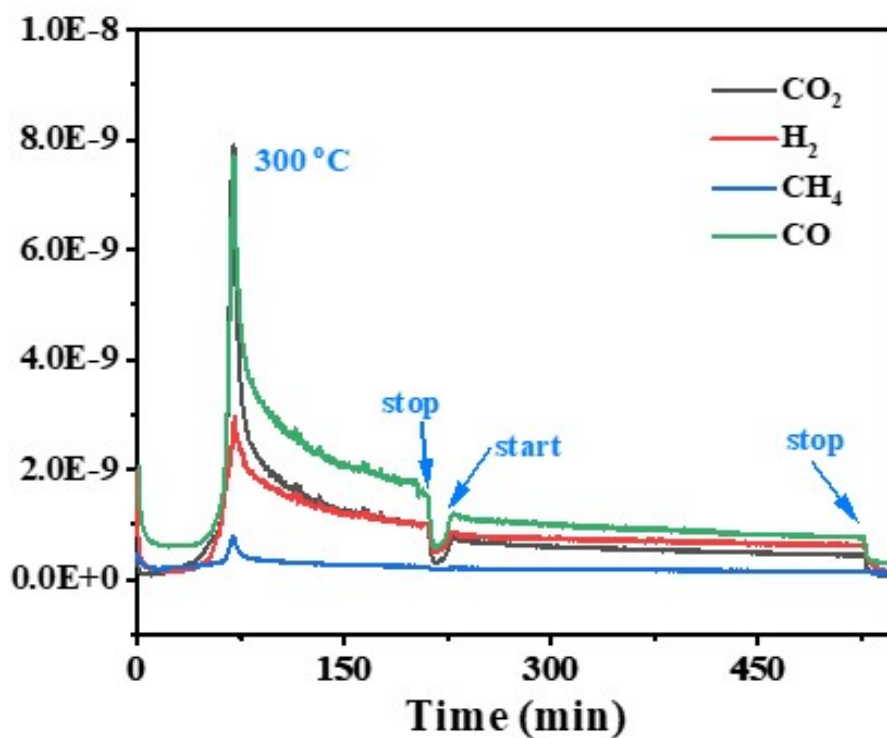

Fig. S7 The decomposition process of Ni-MOF-74 monitored by mass spectrometry from room temperature to 300 °C at a rate of 5 °C·min<sup>-1</sup>.

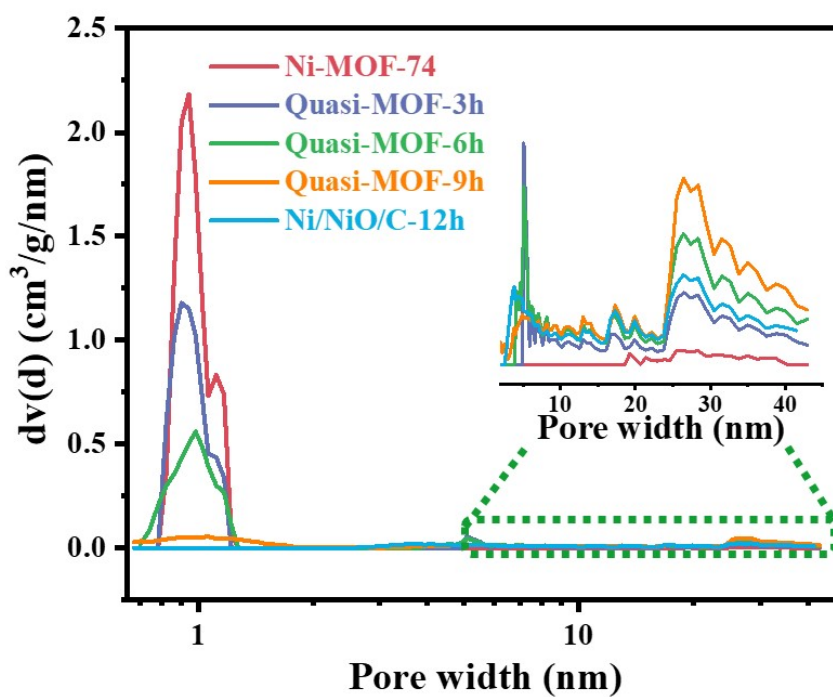

Fig. S8 Pore size distributions at 77 K of Ni-MOF-74 and the derivants.



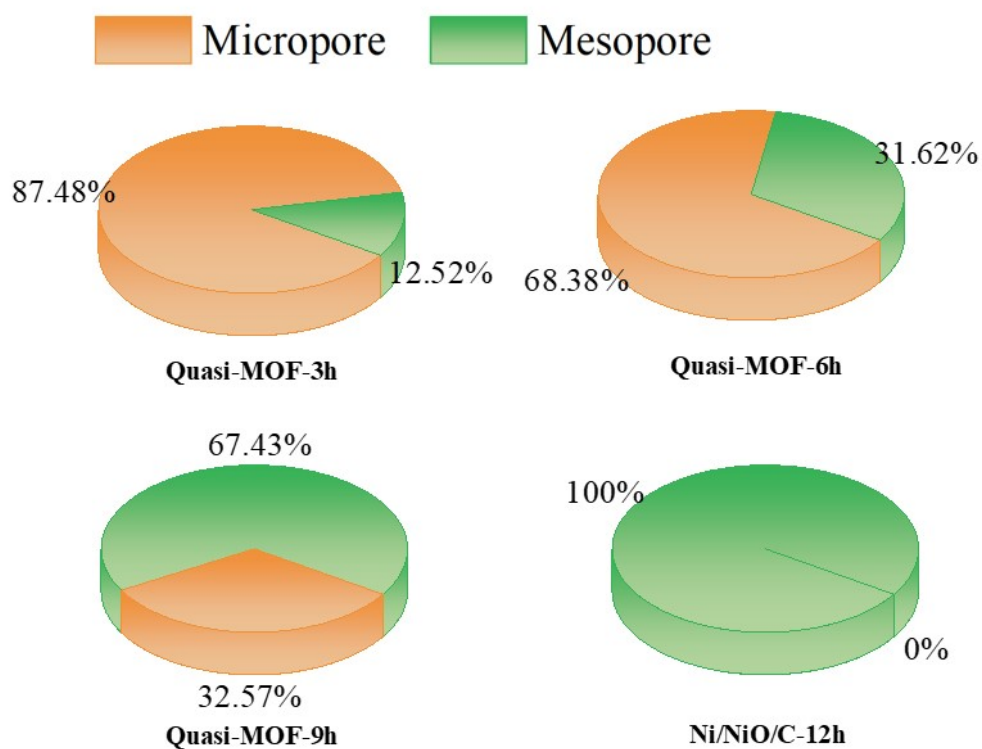

Fig. S9 Percentage of micropore and mesopore of Ni-MOF-74 derivatives.

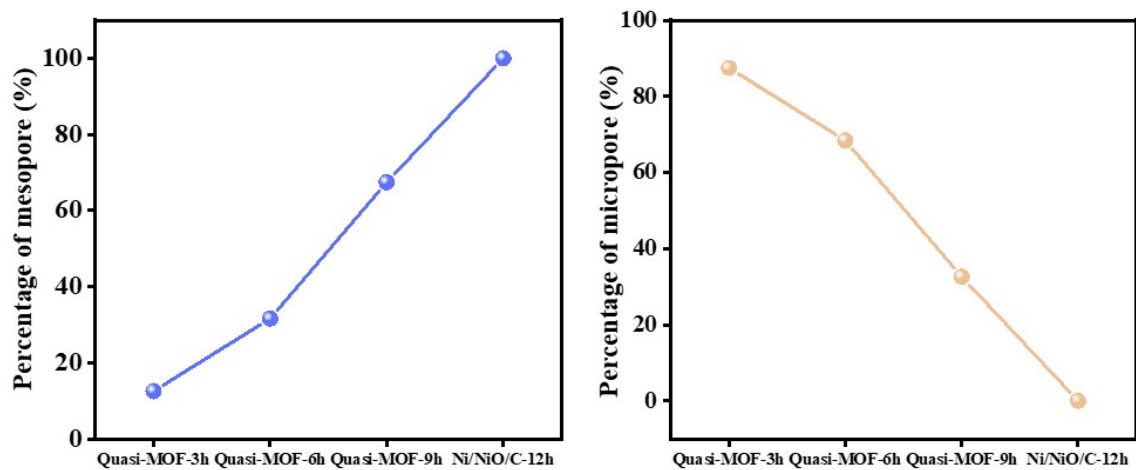

Fig. S10 Changes of micropore and mesopore of Ni-MOF-74 derivatives.

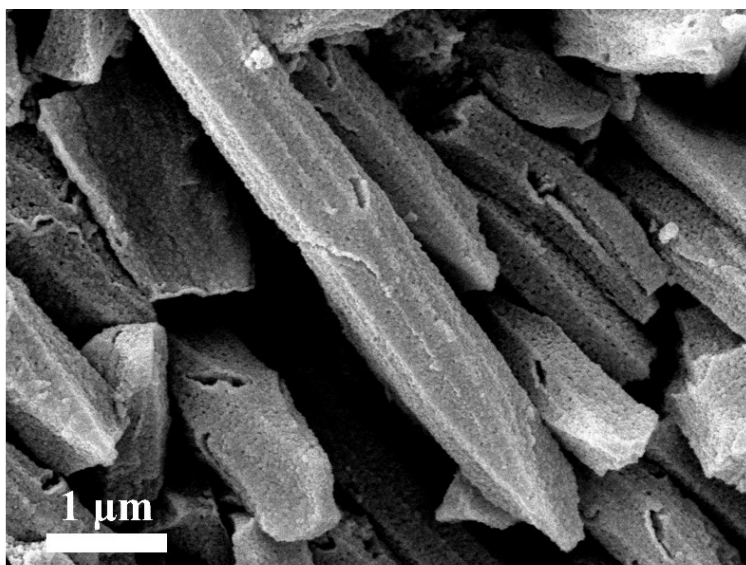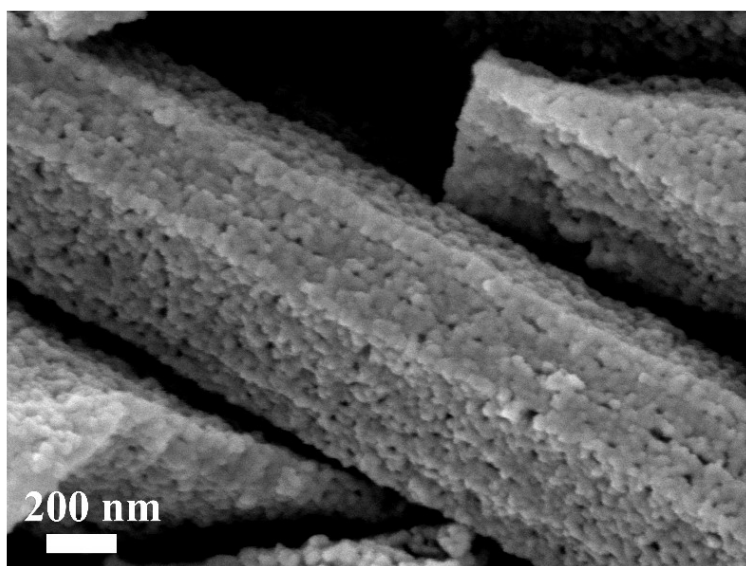

**Fig. S11 SEM of Ni/NiO/C-12h sample.**

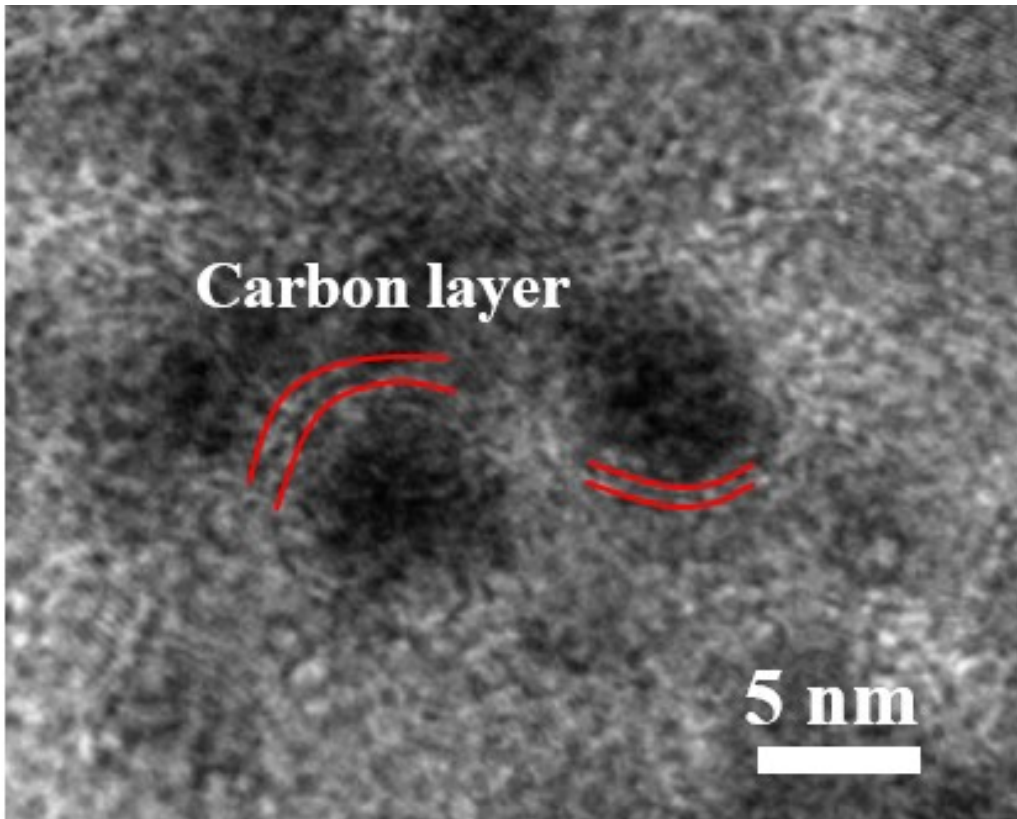

Fig. S12 HRTEM of Quasi-MOF-9h sample.

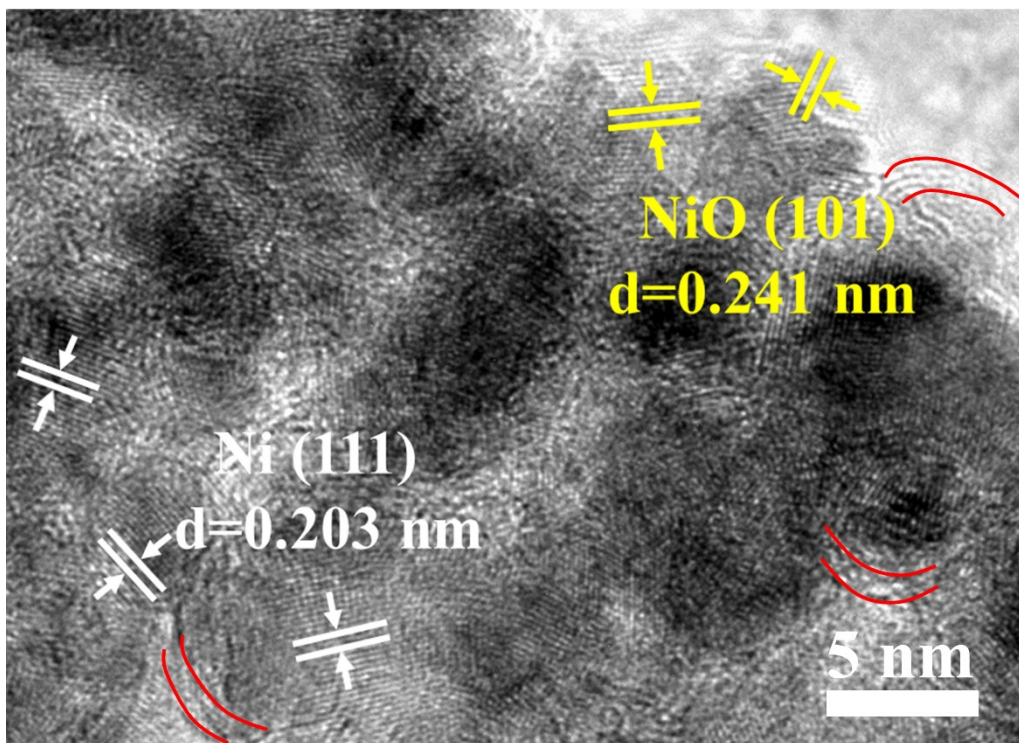

Fig. S13 HRTEM of Ni/NiO/C-12h sample.

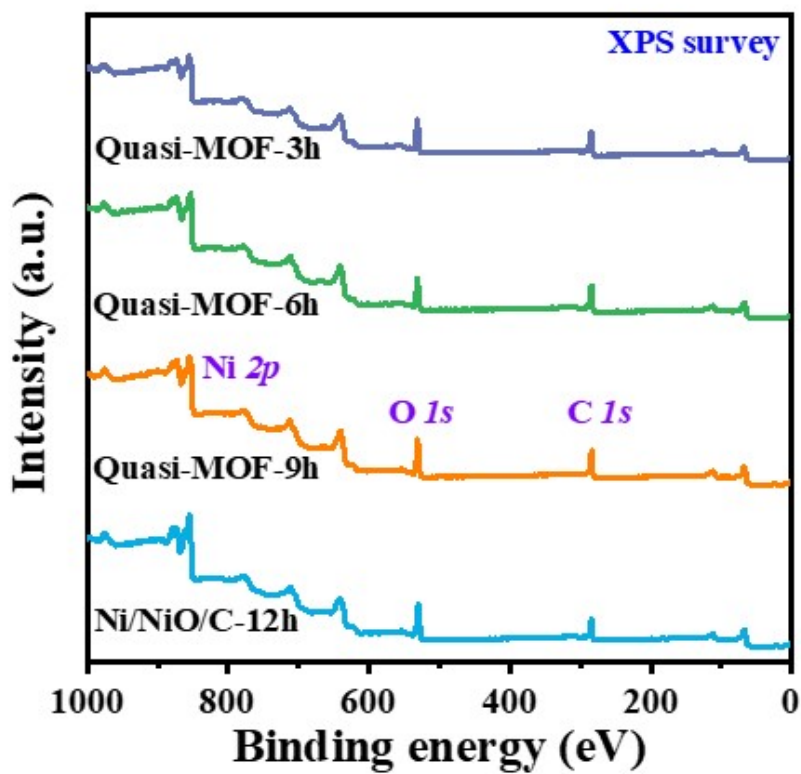

Fig. S14 XPS spectra of survey scan.

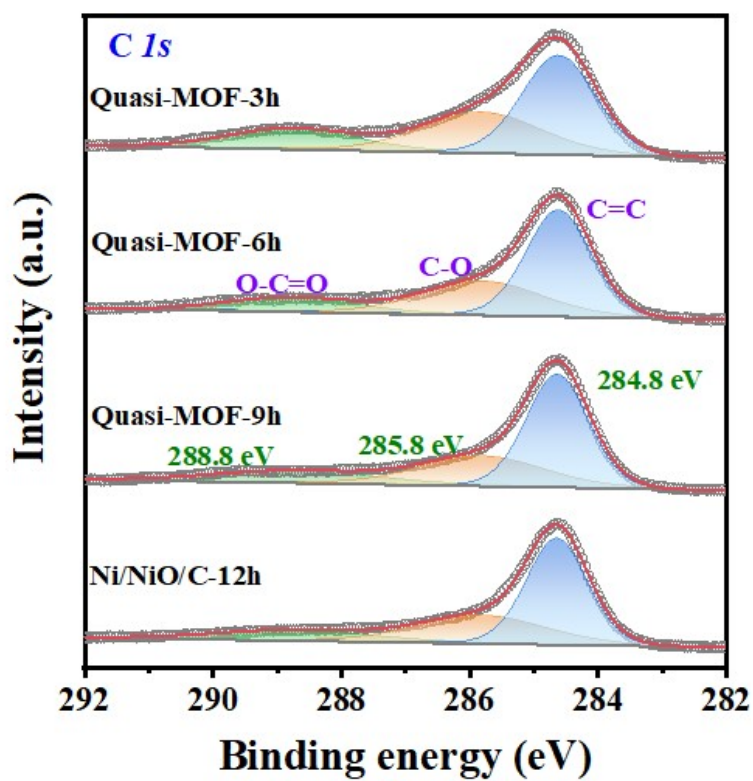

Fig. S15 C 1s spectra of Quasi-MOFs and Ni/NiO/C-12h samples.

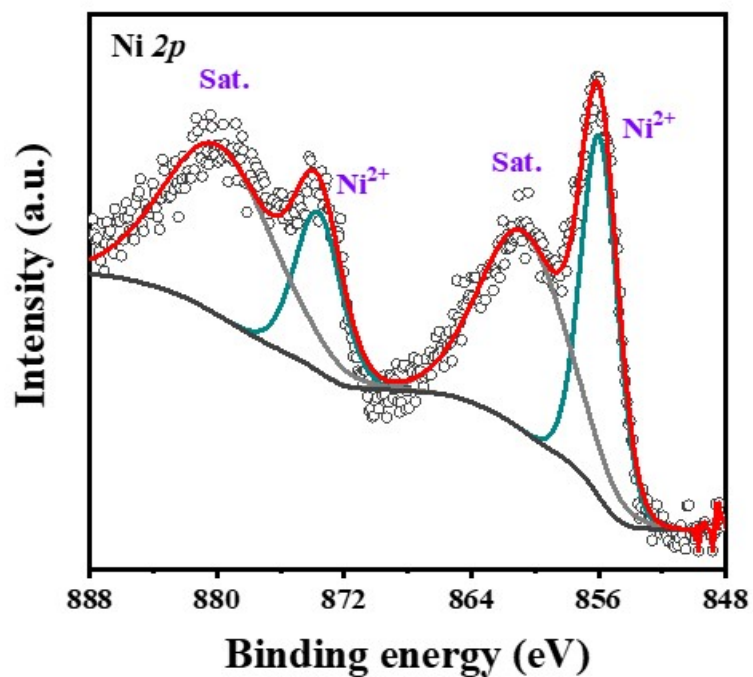

Fig. S16 Ni 2p spectra of Ni-MOF-74 (250) sample.

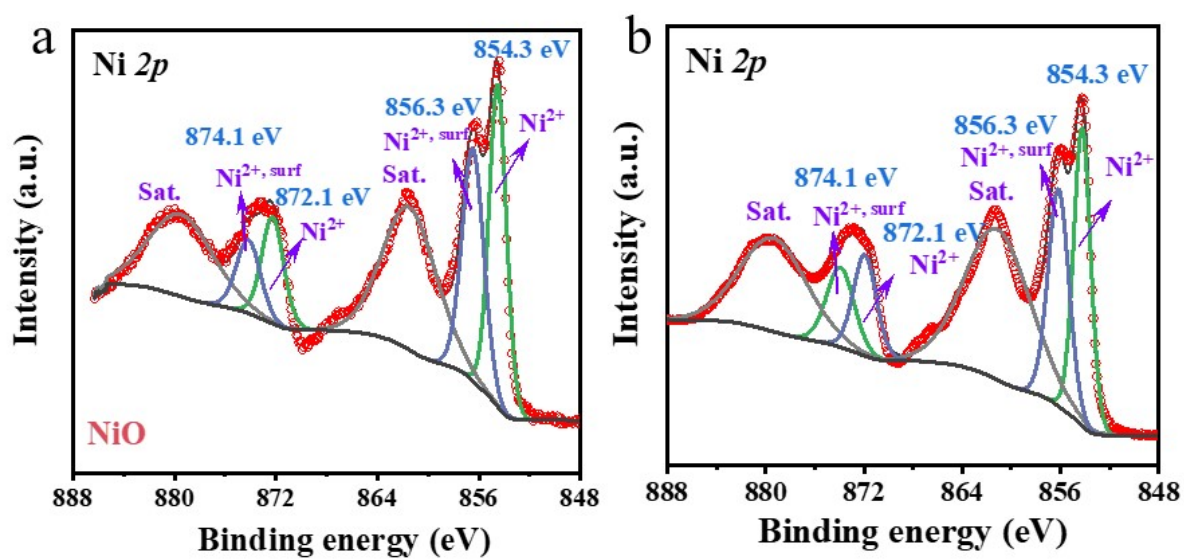

Fig. S17 Ni 2p spectra of a) commercial NiO powder and b) NiO powder prepared by treating  $\text{Ni}(\text{OAc})_2 \cdot 4\text{H}_2\text{O}$  at 300 °C under air conditions.

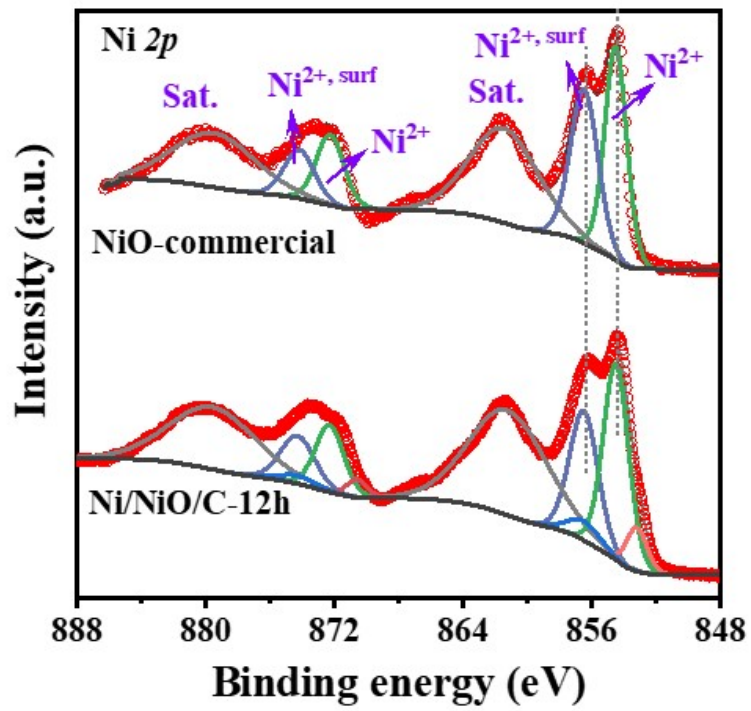

Fig. S18 Ni 2p spectra of Ni-commercial and Ni/NiO/C-12h samples.

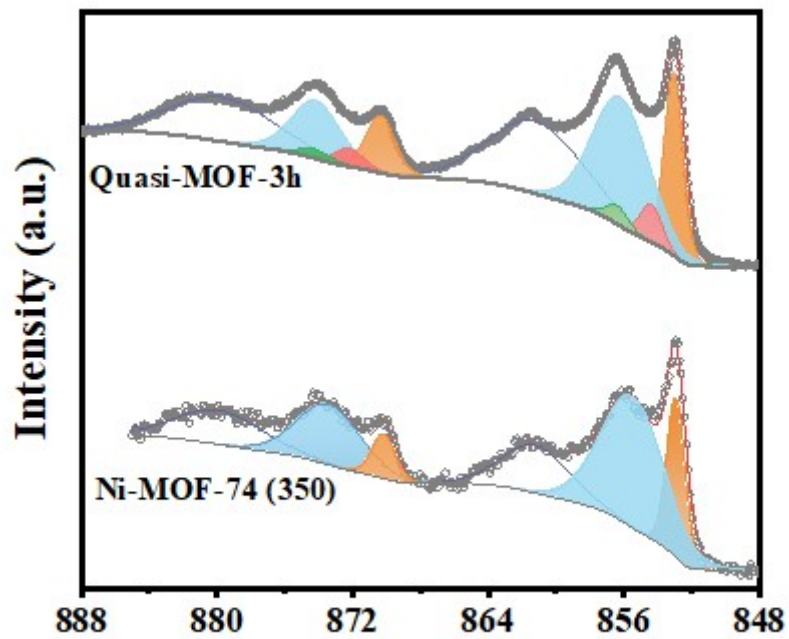

Fig. S19 Ni 2p spectra of Quasi-MOF-3h and Ni-MOF-74 (350) samples.

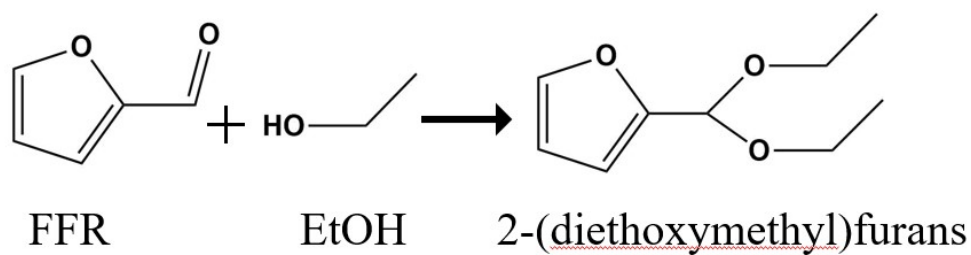

Fig. S20 The condensation reaction route of FFR and ethanol.

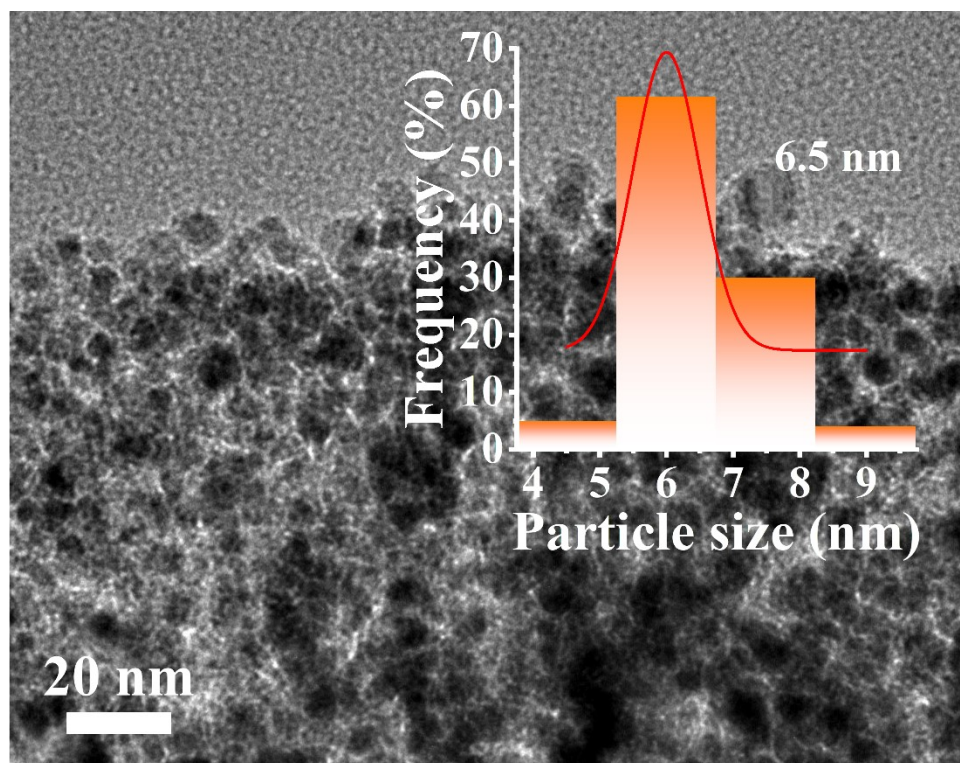

Fig. S21 TEM image of Ni-MOF-74 (350) and corresponding particle size distribution.

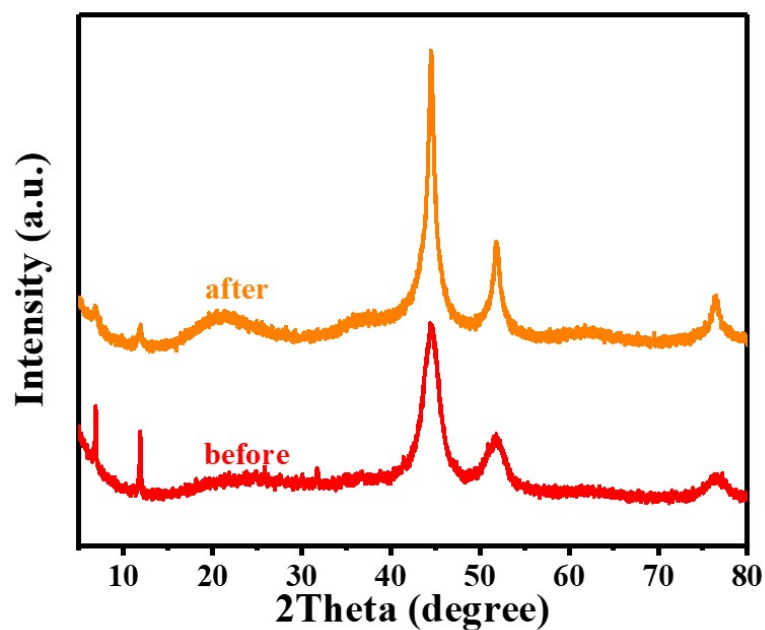

Fig. S22 XRD pattern of Quasi-MOF-9h after five consecutive runs.

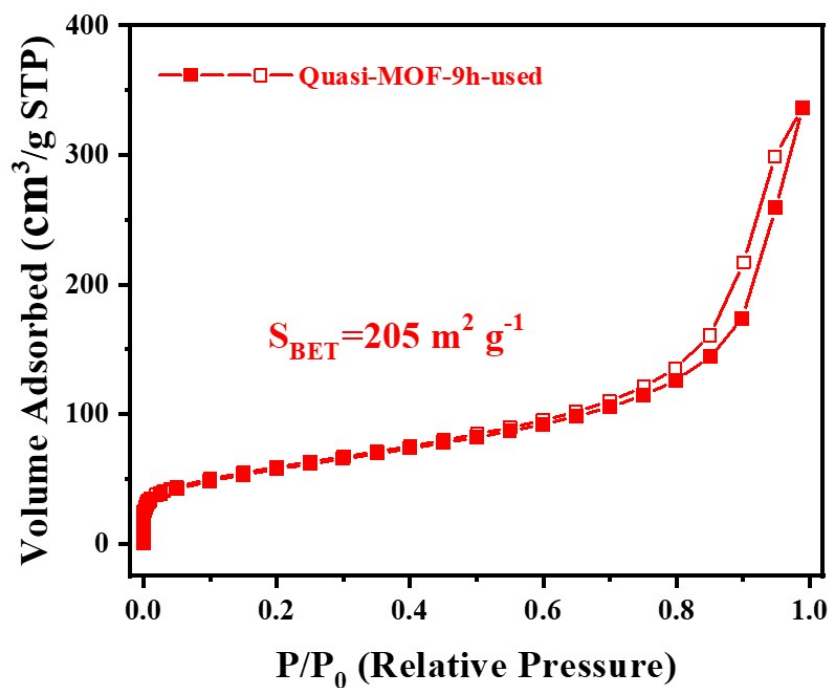

Fig. S23 N<sub>2</sub> adsorption-desorption isotherm at 77 K of Quasi-MOF-9h after five consecutive runs.



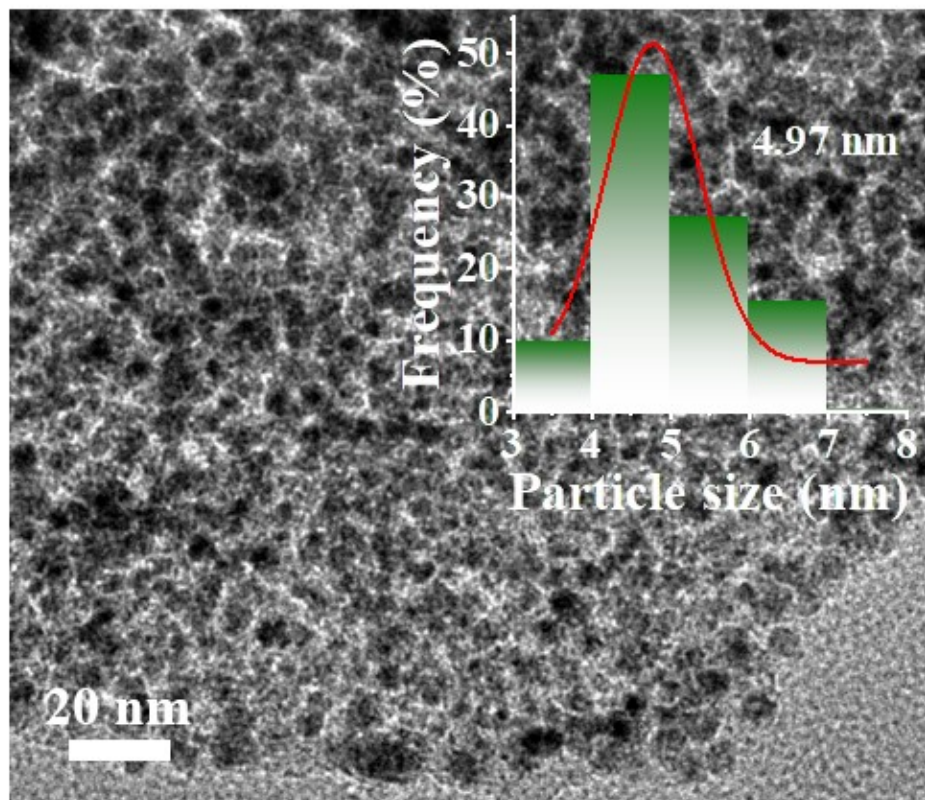

Fig. S24 TEM pattern of Quasi-MOF-9h after five consecutive runs.

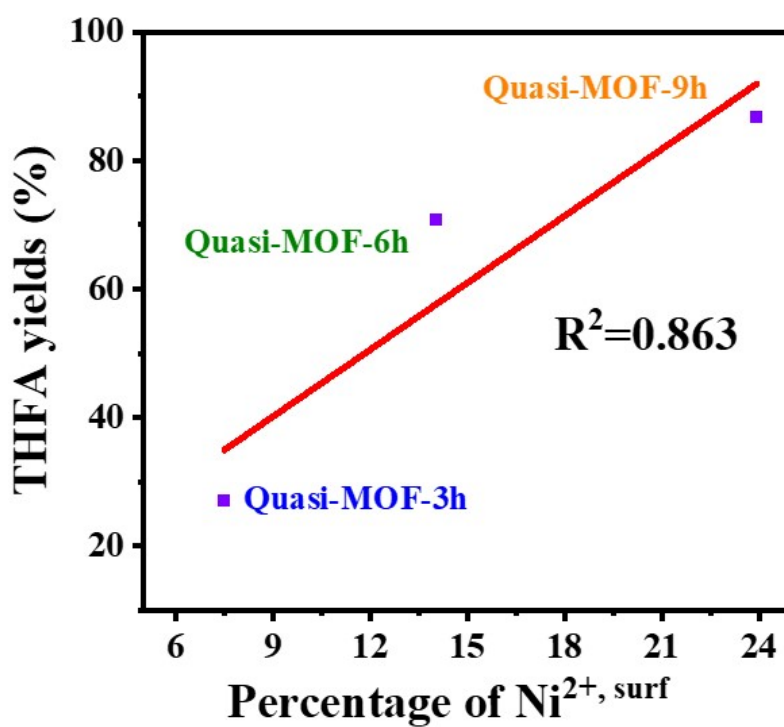

Fig. S25 Correlation between percentage of Ni<sup>2+</sup>, surf and THFA yields.

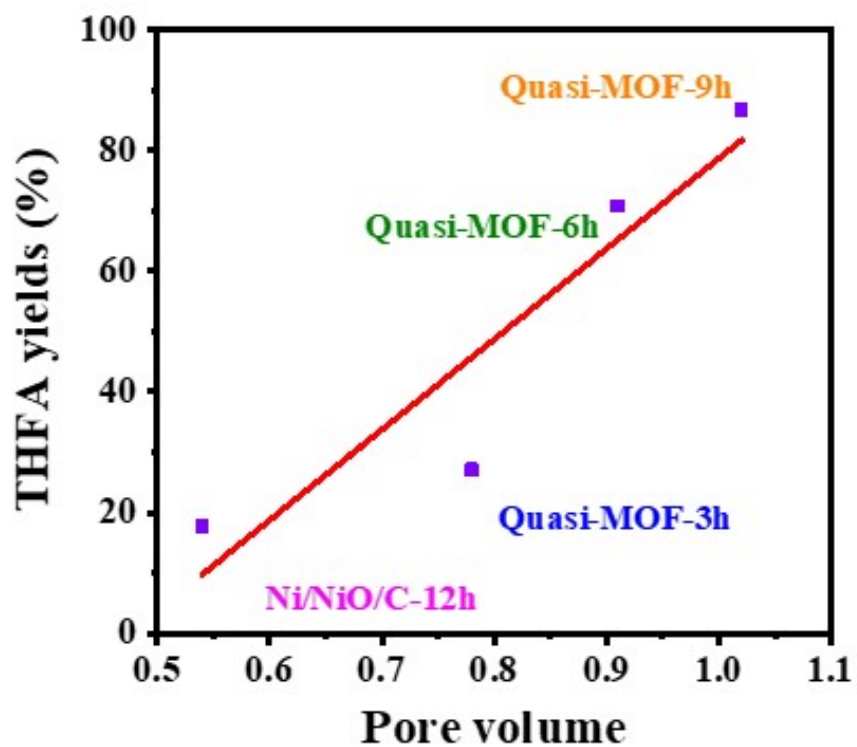

Fig. S26 Correlation between total pore volume and THFA yields.

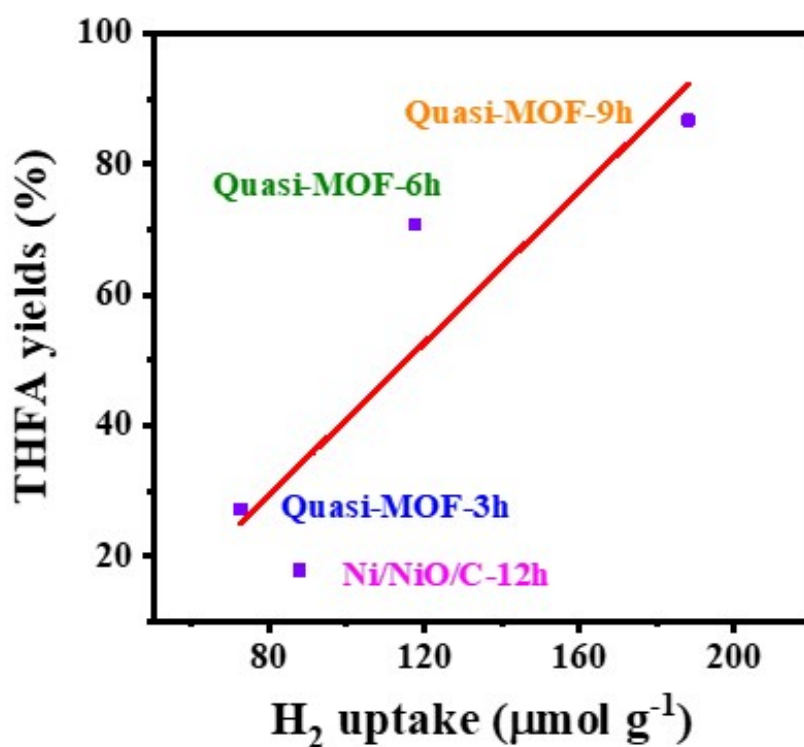

Fig. S27 Correlation between H<sub>2</sub> uptake and THFA yields.

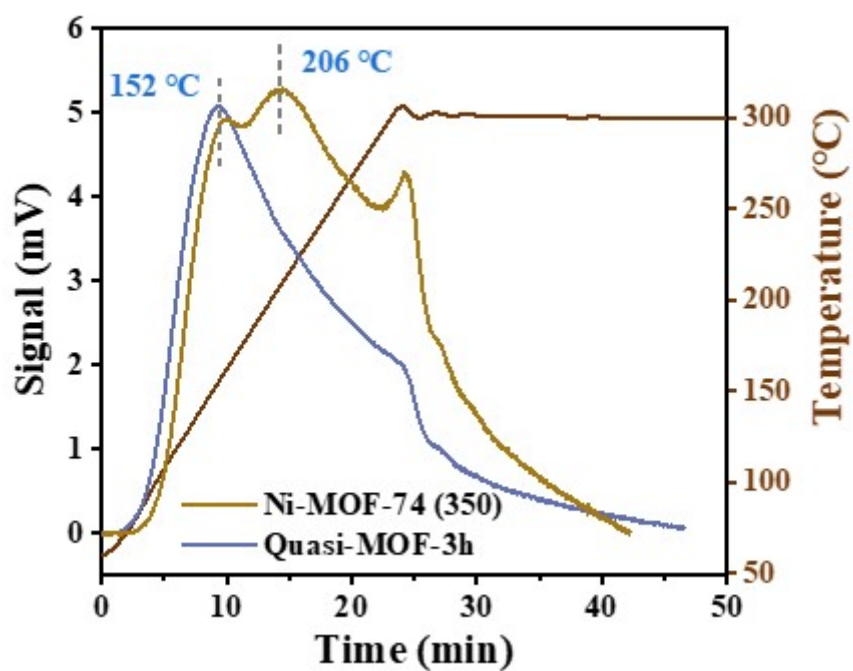

Fig. S28 H<sub>2</sub>-TPD curves of the derivants of Quasi-MOF-3h and Ni-MOF-74(350) samples.

**Table S1. Textural properties of Ni-MOF-74 and Ni-MOF-74 (T) samples**

| Samples         | BET surface area<br>(m <sup>2</sup> ·g <sup>-1</sup> ) | S <sub>micro</sub><br>(m <sup>2</sup> ·g <sup>-1</sup> ) | V <sub>total</sub><br>(cm <sup>3</sup> ·g <sup>-1</sup> ) |
|-----------------|--------------------------------------------------------|----------------------------------------------------------|-----------------------------------------------------------|
| Ni-MOF-74       | 1255                                                   | 1237                                                     | 0.7                                                       |
| Ni-MOF-74 (250) | 1238                                                   | 1103                                                     | 0.56                                                      |
| Ni-MOF-74 (300) | 823                                                    | 720                                                      | 0.78                                                      |
| Ni-MOF-74 (350) | 197                                                    | 19                                                       | 0.85                                                      |

**Table S2. Textural properties of Ni-MOF-74 derivants treated at 300 °C**

| Samples      | BET surface area<br>(m <sup>2</sup> ·g <sup>-1</sup> ) | S <sub>micro</sub><br>(m <sup>2</sup> ·g <sup>-1</sup> ) | V <sub>total</sub><br>(cm <sup>3</sup> ·g <sup>-1</sup> ) | H <sub>2</sub> -uptake <sup>a</sup><br>(μmol·g <sup>-1</sup> ) |
|--------------|--------------------------------------------------------|----------------------------------------------------------|-----------------------------------------------------------|----------------------------------------------------------------|
| Quasi-MOF-3h | 823                                                    | 720                                                      | 0.78                                                      | 87.7                                                           |
| Quasi-MOF-6h | 563                                                    | 385                                                      | 0.91                                                      | 117.7                                                          |
| Quasi-MOF-9h | 261                                                    | 85                                                       | 1.02                                                      | 188.1                                                          |
| Ni/NiO/C-12h | 146                                                    | 0                                                        | 0.54                                                      | 72.5                                                           |

<sup>a</sup> calculated by H<sub>2</sub>-TPD

**Table S3. Elements analysis of the as-prepared samples (XPS results)**

| Samples      | Element atomic (%) |       |       |
|--------------|--------------------|-------|-------|
|              | C 1s               | O 1s  | Ni 2p |
| Quasi-MOF-3h | 54.82              | 28.16 | 17.01 |
| Quasi-MOF-6h | 55.58              | 25.72 | 18.69 |
| Quasi-MOF-9h | 50.05              | 29.12 | 20.83 |
| Ni/NiO/C-12h | 42.98              | 31.16 | 25.86 |

**Table S4. Ratio of integral areas of the Ni 2p XPS high-resolution spectrum**

| Ni 2p <sub>3/2</sub> spectrum | Ni <sup>2+</sup> /% (MOF) | Ni <sup>2+</sup> /% (NiO) | Ni <sup>2+</sup> , surf/% | Ni <sup>0</sup> /% |
|-------------------------------|---------------------------|---------------------------|---------------------------|--------------------|
| Quasi-MOF-3h                  | 58.85                     | 3.74                      | 7.50                      | 29.90              |
| Quasi-MOF-6h                  | 40.38                     | 8.26                      | 14.03                     | 37.33              |
| Quasi-MOF-9h                  | 30.93                     | 13.40                     | 23.92                     | 31.74              |
| Ni/NiO/C-12h                  | 6.41                      | 37.07                     | 47.73                     | 8.78               |

**Table S5. Elements analysis of the as-prepared samples (ICP-OES results)**

| Samples      | Ni contents (wt%) |
|--------------|-------------------|
| Quasi-MOF-3h | 36.5              |
| Quasi-MOF-6h | 50.8              |
| Quasi-MOF-9h | 55.6              |
| Ni/NiO/C-12h | 58.3              |

**Table S6. Catalytic performance of heterogeneous catalysts for the conversion of FFR to****THFA**

| Entry | Catalyst                                            | FFR/Cat. | T    | P     | t   | Conv. | Sele. | Ref. |
|-------|-----------------------------------------------------|----------|------|-------|-----|-------|-------|------|
|       |                                                     | (w/w)    | (°C) | (MPa) | (h) | (%)   | (%)   |      |
| 1     | 3% Pd/MFI <sup>a</sup>                              | 11.6     | 220  | 3.4   | 5   | 100   | 95    | 1    |
| 2     | Ru-MoOx <sup>b</sup>                                | 2.4      | 100  | 2     | 1   | 92.1  | 99    | 2    |
| 3     | Ni/C-500 <sup>a</sup>                               | 1        | 120  | 1     | 2   | 100   | 100   | 3    |
| 4     | Cu-Ni/CNTs <sup>c</sup>                             | 5.8      | 130  | 4     | 10  | 100   | 90.3  | 4    |
| 5     | Cu <sub>1</sub> Ni <sub>3</sub> /MgAlO <sup>c</sup> | 9.6      | 150  | 4     | 3   | >99   | 93    | 5    |
| 6     | Ni-LN650 <sup>b</sup>                               | 3.2      | 120  | 1     | 5   | 98.8  | 87.2  | 6    |
| 7     | Ni-Co/SBA-15 <sup>c</sup>                           | 7.3      | 90   | 5     | 2   | 100   | 92.1  | 7    |
| 8     | Ni@NCNTs-600-800 <sup>b</sup>                       | 3.2      | 100  | 4     | 7   | 100   | 99.5  | 8    |
| 9     | Ni/MMO-CO <sub>3</sub> <sup>a</sup>                 | 5.8      | 110  | 3     | 3   | 100   | 99    | 9    |
| 10    | NiCo <sup>a</sup>                                   | 6.7      | 200  | 8     | 8   | 100   | 93    | 10   |
| 11    | PdCo <sub>3</sub> O <sub>4</sub> @NC <sup>a</sup>   | 1.4      | 150  | 2     | 6   | 100   | 95    | 11   |
| 12    | NiCu <sup>b</sup>                                   | 2.5      | 140  | 4     | 4   | 100   | 95    | 12   |
| 13    | NiCu <sub>0.33</sub> /C <sup>c</sup>                | 67       | 150  | 3     | 18  | 100   | 94.6  | 13   |
| 14    | PdNiCo/N-CNTs <sup>c</sup>                          | 8        | 120  | 3     | 3   | 100   | 97.1  | 14   |
| 15    | Ni(40)/MgO(30)-M <sup>c</sup>                       | 2.5      | 140  | 4     | 4   | 100   | 100   | 15   |
| 16    | Ni/C-400 <sup>c</sup>                               | 6        | 80   | 3     | 4   | 99    | 96.1  | 16   |
| 17    | Ni/C-400 <sup>c</sup>                               | 6        | 80   | 1     | 4   | 100   | 98.5  | 17   |
| 18    | Ni/TiO <sub>2</sub> -300-450R <sup>a</sup>          | 1.9      | 180  | 2     | 4   | 100   | 25    | 18   |

|    |                                           |     |     |   |     |     |    |              |
|----|-------------------------------------------|-----|-----|---|-----|-----|----|--------------|
| 19 | Pd/LaQS <sup>a</sup>                      | 1.9 | 120 | 2 | 0.5 | 100 | 99 | 19           |
| 20 | CuNiO <sub>x</sub> (1/1)-150 <sup>a</sup> | 4.8 | 120 | 3 | 6   | 100 | 97 | 20           |
| 21 | Pd/KCC 0.3 <sup>a</sup>                   | 3   | 50  | 2 | 6   | 100 | 85 | 21           |
| 22 | Quasi-MOF-9h <sup>c</sup>                 | 6   | 70  | 3 | 4   | 100 | 98 | This<br>work |

<sup>a</sup>2-isopropyl alcohol, <sup>b</sup>water, <sup>c</sup>ethanol

## Reference:

- 1 N. S. Biradar, A. M. Hengne, S. N. Birajdar, P. S. Niphadkar, P. N. Joshi and C. V. Rode, *ACS Sustain. Chem. Eng.*, 2013, **2**, 272-281.
- 2 Y. Cao, H. Zhang, K. Liu, Q. Zhang and K. Chen, *ACS Sustain. Chem. Eng.*, 2019, **7**, 12858-12866.
- 3 Y. Su, C. Chen, X. Zhu, Y. Zhang, W. Gong, H. Zhang, H. Zhao and G. Wang, *Dalton Trans.*, 2017, **46**, 6358-6365.
- 4 L. Liu, H. Lou and M. Chen, *Int. J. Hydrogen Energy*, 2016, **41**, 14721-14731.
- 5 J. Wu, G. Gao, J. Li, P. Sun, X. Long and F. Li, *Appl. Catal. B*, 2017, **203**, 227-236.
- 6 C. Chen, R. Fan, W. Gong, H. Zhang, G. Wang and H. Zhao, *Dalton Trans.*, 2018, **47**, 17276-17284.
- 7 S. Li, Y. Wang, L. Gao, Y. Wu, X. Yang, P. Sheng and G. Xiao, *Microporous Mesoporous Mater.*, 2018, **262**, 154-165.
- 8 Wanbing Gong, Chun Chen, Haimin Zhang, G. Wang and H. Zhao, *Catal. Sci. Technol.*, 2018, **8**, 5506-5514.
- 9 X. Meng, Y. Yang, L. Chen, M. Xu, X. Zhang and M. Wei, *ACS Catal.*, 2019, **9**, 4226-4235.
- 10 J. Parikh, S. Srivastava and G. C. Jadeja, *Ind. Eng. Chem. Res.*, 2019, **58**, 16138-16152.
- 11 S. Pendem, S. R. Bolla, D. J. Morgan, D. B. Shinde, Z. Lai, L. Nakka and J. Mondal, *Dalton Trans.*, 2019, **48**, 8791-8802.
- 12 V. Sánchez, P. Salagre, M. D. González, J. Llorca and Y. Cesteros, *Molecular Catalysis*, 2020, **490**, 110956.
- 13 F. Tang, L. Wang, M. Dessie Walle, A. Mustapha and Y. Liu, *J. Catal.*, 2020, **383**, 172-180.
- 14 L. Ruan, A. Pei, J. Liao, L. Zeng, G. Guo, K. Yang, Q. Zhou, N. Zhao, L. Zhu and B. H. Chen, *Fuel*, 2021, **284**, 119015.
- 15 C. Sunyol, R. English Owen, M. D. González, P. Salagre and Y. Cesteros, *APPL CATAL A-GEN*, 2021, **611**, 117903.
- 16 D. Liu, Q. Fu, C. Feng, T. Xiang, H. Ye, Y. Shi, L. Li, P. Dai, X. Gu and X. Zhao,



*Nanomaterials*, 2023, **13**, 285.

- 17 Q. Fu, L. Yan, D. Liu, S. Zhang, H. Jiang, W. Xie, L. Yang, Y. Wang, H. Wang and X. Zhao, *Appl. Catal. B*, 2024, 343, 123501.
- 18 J. Zhang, D. Mao, H. Zhang and D. Wu, *APPL CATAL A-GEN*, 2023, **660**, 119206.
- 19 X. Zhao, Y. Wang, Z. Zhai, C. Zhuang, D. Tian, H. Guo, X. Zou and T. X. Liu, *ACS Applied Nano Materials*, 2023, **6**, 8315-8324.
- 20 W. Fang, S. Liu, A. K. Steffensen, L. Schill, G. Kastlunger and A. Riisager, *ACS Catal.*, 2023, **13**, 8437-8444.
- 21 Y. E. Kim, K.-Y. Lee and M. S. Lee, *Catal. Today*, 2024, **426**, 114392.
